# Supplementary material
Source: MDPI journal article supplement (https://www.mdpi.com/2077-0472/8/12/195)
Supplement: s1 [file s1]

## Supplementary materials

**Table S1.** The main ELISA test systems for the control of grapevine virus pathogens that are commercially available.

| Manufacturer Company, Country, Company Website | Controlled Pathogens       | Assay Format | Additional Information                                                                                                                                                                                                                                                                                                                                                                                                                     |
|------------------------------------------------|----------------------------|--------------|--------------------------------------------------------------------------------------------------------------------------------------------------------------------------------------------------------------------------------------------------------------------------------------------------------------------------------------------------------------------------------------------------------------------------------------------|
| Agdia, USA; www.agdia.com                      | GFLV                       | DAS-ELISA    | Coating IgG: polyclonal. Phosphatase conjugate: polyclonal. Assaying plant foliage.                                                                                                                                                                                                                                                                                                                                                        |
|                                                | ArMV (Arabis mosaic virus) | DAS-ELISA    | Coating IgG: polyclonal. Phosphatase conjugate: polyclonal. Assaying plant foliage.                                                                                                                                                                                                                                                                                                                                                        |
| Bioreba, Switzerland; www.bioreba.ch           | GFLV                       | DAS-ELISA    | Coating IgG: polyclonal. Phosphatase conjugate: monoclonal. The antibodies against the isolates of the GFLV from Central Europe (Colmar, France) and Canada (Vineland Research Station, Ontario). The use of young leaves or sprouting buds and juicy bark is recommended.                                                                                                                                                                 |
|                                                | GFkV                       | DAS-ELISA    | Coating IgG: polyclonal. Phosphatase conjugate: monoclonal. The antibodies against an GFkV isolate of Rupestris St. Georges grapevine. Mature leaves and bark (phloem) scrapings are recommended for testing.                                                                                                                                                                                                                              |
|                                                | GLRaV-1                    | DAS-ELISA    | Coating IgG: monoclonal. Phosphatase conjugate: monoclonal. The reagents contain complementary monoclonal antibodies to isolates of the GLRaV-1. Mature leaves (especially petioles) and bark (phloem) scrapings from dormant canes are recommended for testing.                                                                                                                                                                           |
|                                                | GLRaV-3                    | DAS-ELISA    | Coating IgG: polyclonal/monoclonal. Phosphatase conjugate: polyclonal/monoclonal. Antibodies against purified viruses of different isolates, as well as a recombinant coat protein of the GLRaV-3. Well-developed mature leaves, especially petioles and veins from the lower part late in the growing season, and bark (phloem) scrapings from mature canes, are recommended for testing.                                                 |
|                                                | GLRaV-1+3                  | DAS-ELISA    | Coating IgG: polyclonal/monoclonal. Phosphatase conjugate: polyclonal/monoclonal. Mixtures of complementary monoclonal antibodies to isolates of GLRaV-1, as well as the poly- and monoclonal antibodies against the purified virus and its recombinant protein. Well-developed mature leaves, especially petioles and veins from the lower part of the plant, and bark (phloem) scrapings from mature canes, are recommended for testing. |
|                                                | GLRaV-2                    | DAS-ELISA    | Coating IgG: monoclonal. Phosphatase conjugate: polyclonal. Monoclonal antibodies against an isolate of the Chasselas clone 8/22. Polyclonal antibodies against an isolate from a Pinot Noir grapevine in Oregon. Mature leaves and bark (phloem) scrapings from dormant canes are recommended for testing.                                                                                                                                |
|                                                | GLRaV-4 strains            | DAS-ELISA    | Coating IgG: monoclonal. Phosphatase conjugate: monoclonal. The reagents contain a mixture of complementary monoclonal antibodies that recognise the GLRaV-4 and its strains 5, 6, 9, and Ob. Bark (phloem) scrapings from mature canes and mature leaves (especially petioles) are recommended for testing.                                                                                                                               |
|                                                | GLRaV-4 strain 6           | DAS-ELISA    | Coating IgG: polyclonal. Phosphatase conjugate: monoclonal. The antibodies against an isolate of the Chasselas clone 8/22 detect the GLRaV-4 strain 6, formerly named the GLRaV IIa. Mature leaves and bark (phloem) scrapings from dormant canes (especially well-developed middle-aged leaves, veins, and petioles) are recommended for testing.                                                                                         |
|                                                | GVA                        | DAS-ELISA    | Coating IgG: polyclonal. Phosphatase conjugate: polyclonal/monoclonal. Polyclonal antibodies are raised against a recombinant virus coat protein, and monoclonal ones are raised against the CH-781 isolate. Well-developed leaves from the lower part of the plant, and bark (phloem) scrapings (cortical scrapings) from mature canes during dormancy are recommended for testing.                                                       |

|                                                            |                                        |           |                                                                                                                                                                                                                                                                                                  |
|------------------------------------------------------------|----------------------------------------|-----------|--------------------------------------------------------------------------------------------------------------------------------------------------------------------------------------------------------------------------------------------------------------------------------------------------|
|                                                            | GPGV (grapevine pinot gris virus)      | DAS-ELISA | Coating IgG: polyclonal. Phosphatase conjugate: polyclonal. The antibodies are made against a recombinant coat protein. Bark (phloem) scrapings from dormant canes and leaves from young shoots are recommended for testing. Sampling mature leaves is not recommended during summer or in fall. |
| Creative Diagnostics, USA;<br>www.creative-diagnostics.com | GFLV                                   | DAS-ELISA | Sample—grapevine phloem, infected grapevine plant foliage.                                                                                                                                                                                                                                       |
|                                                            | GfKv                                   | DAS-ELISA | Sample—grapevine phloem.                                                                                                                                                                                                                                                                         |
|                                                            | GLRaV-1                                | DAS-ELISA | Sample—grapevine phloem.                                                                                                                                                                                                                                                                         |
|                                                            | GLRaV-3                                | DAS-ELISA | Sample—grapevine phloem.                                                                                                                                                                                                                                                                         |
|                                                            | GVA                                    | DAS-ELISA | Sample—grapevine phloem.                                                                                                                                                                                                                                                                         |
| Loewe Biochemica, Germany;<br>www.loewe-info.com           | GLRaV-7                                | DAS-ELISA | Using polyclonal rabbit antibodies.                                                                                                                                                                                                                                                              |
| Sediag, France;<br>www.sediag.com                          | GFLV                                   | DAS-ELISA | Coating IgG: polyclonal. Phosphatase conjugate: monoclonal. Assaying leaves, stems, or seeds.                                                                                                                                                                                                    |
|                                                            | GfKv                                   | TAS-ELISA | Coating IgG: polyclonal. Phosphatase conjugate: monoclonal. Assaying leaves, stems, or seeds.                                                                                                                                                                                                    |
|                                                            | GLRaV-1                                | DAS-ELISA | Coating IgG: monoclonal. Phosphatase conjugate: monoclonal. Leaves, stems, or seeds are recommended for testing.                                                                                                                                                                                 |
|                                                            | GLRaV-1 +3                             | DAS-ELISA | Assaying leaves, stems, or seeds.                                                                                                                                                                                                                                                                |
|                                                            | GLRaV-2                                | TAS-ELISA | Coating IgG: polyclonal. Monoclonal antibodies. Phosphatase conjugate: anti-species antibodies. Assaying leaves, stems, or seeds.                                                                                                                                                                |
|                                                            | GLRaV-3                                | DAS-ELISA | Coating IgG: polyclonal. Phosphatase conjugate: polyclonal. Assaying leaves, stems, or seeds.                                                                                                                                                                                                    |
|                                                            | GLRaV-5                                | DAS-ELISA | Coating IgG: polyclonal. Biotinylated polyclonal antibodies. Streptavidin–phosphatase. Assaying leaves, stems, or seeds.                                                                                                                                                                         |
|                                                            | GVA                                    | DAS-ELISA | Coating IgG: polyclonal. Phosphatase conjugate: polyclonal. Assaying leaves, stems, or seeds.                                                                                                                                                                                                    |
|                                                            | GVB                                    | DAS-ELISA | Coating IgG: monoclonal. Biotinylated monoclonal antibodies. Streptavidin–phosphatase. Assaying leaves, stems, or seeds.                                                                                                                                                                         |
|                                                            | GALV (grapevine Algerian latent virus) | DAS-ELISA | Using polyclonal rabbit antiserum.                                                                                                                                                                                                                                                               |
|                                                            | GFLV                                   | DAS-ELISA | Using polyclonal rabbit antiserum.                                                                                                                                                                                                                                                               |
|                                                            | GLRaV-1                                | DAS-ELISA | Using polyclonal rabbit antiserum.                                                                                                                                                                                                                                                               |
|                                                            | GLRaV-3                                | DAS-ELISA | Using polyclonal rabbit antiserum.                                                                                                                                                                                                                                                               |

**Table S2.** The main commercial kits based on nucleic acid amplification for grapevine viruses diagnostic.

| Manufacturer<br>Company, Country,<br>Company Website | Controlled Pathogens                       | Assay Format                                                                   | Additional Information                                               |
|------------------------------------------------------|--------------------------------------------|--------------------------------------------------------------------------------|----------------------------------------------------------------------|
| Agdia, USA;<br>www.agdia.com                         | GRBaV                                      | AmplifyRP® Acceler8®<br>DNA amplification with detection by lateral flow strip | Biotin-labelled primer/FITC probe; field-based or laboratory testing |
| NANO Diagnostics,<br>USA;<br>www.nanodiainc.com      | GFLV                                       | Immunocapture RT-PCR and immunocapture qRT-PCR                                 | Strips pre-coated with specific antibody and complete kit available  |
|                                                      | GFkV                                       | Immunocapture RT-PCR and immunocapture qRT-PCR                                 | Strips pre-coated with specific antibody and complete kit available  |
|                                                      | GLRaV-1                                    | Immunocapture RT-PCR                                                           | Strips pre-coated with specific antibody and complete kit available  |
|                                                      | GLRaV-2                                    | Immunocapture RT-PCR and immunocapture qRT-PCR                                 | Strips pre-coated with specific antibody and complete kit available  |
|                                                      | GLRaV-3                                    | Immunocapture RT-PCR and immunocapture qRT-PCR                                 | Strips pre-coated with specific antibody and complete kit available  |
|                                                      | ArMV                                       | Immunocapture kit for RT-PCR                                                   | Pre-coated PCR tubes for capturing virus particles                   |
|                                                      | GRSPaV                                     | Immunocapture kit for RT-PCR                                                   | Pre-coated PCR tubes for capturing virus particles                   |
| Qualiplante SAS; France;<br>www.qualiplante.eu       | ArMV+ GFLV                                 | Triplex end-point PCR                                                          | Matrices: leaf, wood; internal control is included                   |
|                                                      | ArMV+GFLV+GLRaV-1+GLRaV-2+GLRaV-3+GVA+GFkV | Multiplex end-point PCR                                                        | Matrices: leaf, wood; internal control is included                   |
|                                                      | GPGV                                       | One-step RT-PCR                                                                | Matrices: leaf, wood                                                 |
|                                                      | GPGV                                       | One-step real-time RT-PCR                                                      | Matrices: leaf, wood; SYBR-Green® technology                         |
|                                                      | GRBaV                                      | Real-time PCR                                                                  | Matrices: leaf, wood; SYBR-Green technology®                         |
|                                                      | GRBaV                                      | End-point PCR                                                                  | Matrices: leaf, wood                                                 |
|                                                      | GFLV                                       | One-step real-time RT-PCR                                                      | Matrices: leaf, wood; Taq-Man® technology, FAM fluorophore           |
|                                                      | GFkV                                       | One-step real-time RT-PCR                                                      | Matrices: leave, wood; Taq-Man® technology, FAM fluorophore          |
|                                                      | GLRaV-1                                    | Real-time PCR                                                                  | Matrices: leaf, wood; SYBR-Green® technology                         |
|                                                      | GLRaV-1                                    | One-step real-time RT-PCR                                                      | Matrices: leaf, wood; Taq-Man® technology, FAM fluorophore           |
|                                                      | GLRaV-1+ GLRaV-2+ GLRaV-3                  | Multiplex end-point PCR                                                        | Matrices: leaf, wood; internal control                               |
|                                                      | GLRaV-2                                    | One-step real-time RT-PCR                                                      | Matrices: leaf, wood; Taq-Man® technology, FAM fluorophore           |
|                                                      | GLRaV-3                                    | Real-time PCR                                                                  | Matrices: leaf, wood; SYBR-Green® technology                         |
|                                                      | GLRaV-3                                    | One-step real-time RT-PCR                                                      | Matrices: leaf, wood; Taq-Man® technology, FAM fluorophore           |
|                                                      | GVA                                        | One-step real-time RT-PCR                                                      | Matrices: leaf, wood; Taq-Man® technology, FAM fluorophore           |
|                                                      | GVB                                        | One-step real-time RT-PCR                                                      | Matrices: leaf, wood; Taq-Man® technology, FAM fluorophore           |
